# Supplementary material
Source: Royal Society of Chemistry journal article supplement (doi:10.1039/d6cp00192k)
Supplement: d6cp00192k1.pdf [file d6cp00192k1.pdf]

## Supplementary Information for

# Epitaxial growth of a buckled BiP monolayer on Bi(111)

Ting-Ting Zhang, Gang Yao\*, Xiao-Tian Yang, Kai Sun, Ji-Yong Yang, Min-Long Tao,  
Hua-Xing Zhu, Jun-Zhong Wang\*

School of Physical Science and Technology, Southwest University, Chongqing 400715,  
China.

Supplementary Table 1 –2.

We performed additional calculations using GGA, DFT-D2, vdW-DF, vdW-DF2, and optB88-vdW. All six configurations in Fig. 5 were fully relaxed with each functional. The calculated total energies are summarized in Table S1, and the corresponding relative energies are shown in Table S2.

**Table S1.** Total energies (in eV/unit cell) of the six adsorption configurations shown in Fig. 5, calculated with GGA and five different vdW-inclusive functionals.

| Config. | GGA       | DFT-D2    | DFT-D3    | vdw-DF    | vdw-DF2  | optB88-vdW |
|---------|-----------|-----------|-----------|-----------|----------|------------|
| 1       | -32.42312 | -33.89073 | -30.60514 | -18.07545 | -4.04376 | -4.14387   |
| 2       | -32.51655 | -33.88839 | -30.70673 | -20.32543 | -4.10329 | -4.3142    |
| 3       | -32.26287 | -33.64602 | -30.45567 | -13.38278 | -4.05406 | -4.22021   |
| 4       | -32.48778 | -33.94519 | -30.64656 | -20.86983 | -4.16809 | -4.2457    |
| 5       | -32.53641 | -33.94659 | -30.71641 | -21.14078 | -4.16753 | -4.45218   |
| 6       | -32.32789 | -33.82234 | -30.51778 | -20.05681 | -4.10377 | -4.33261   |

**Table S2.** Relative energies (in eV/unit cell) of the six adsorption configurations, referenced to Config 5 for each functional. Values are derived from the total energies in Table S1.

| Config | GGA     | DFT-D2  | DFT-D3  | vdw-DF  | vdw-DF2  | optB88-vdW |
|--------|---------|---------|---------|---------|----------|------------|
| 1      | 0.11329 | 0.05586 | 0.11127 | 3.06533 | 0.12377  | 0.30831    |
| 2      | 0.01986 | 0.05820 | 0.00968 | 0.81535 | 0.06424  | 0.13798    |
| 3      | 0.27354 | 0.30057 | 0.26074 | 7.75800 | 0.11347  | 0.23197    |
| 4      | 0.04863 | 0.00140 | 0.06985 | 0.27095 | -0.00056 | 0.20648    |
| 5      | 0.00000 | 0.00000 | 0.00000 | 0.00000 | 0.00000  | 0.00000    |
| 6      | 0.20852 | 0.12425 | 0.19863 | 1.08397 | 0.06376  | 0.11957    |
